# Supplementary material for: Identification of immune-related biomarkers associated with tumorigenesis and prognosis in cutaneous melanoma patients
Source: Springer Nature journal article supplement (doi:10.1186/s12935-020-01271-2), 2020-05-25

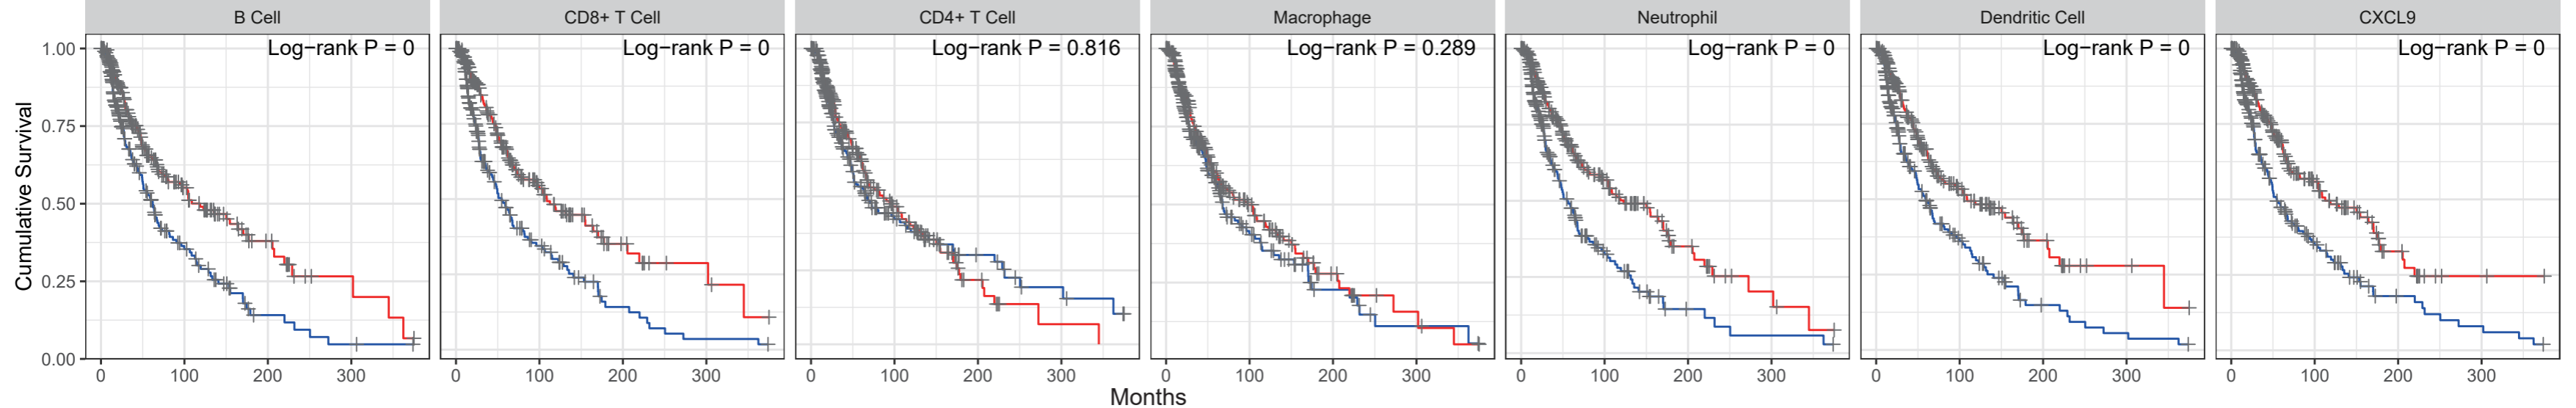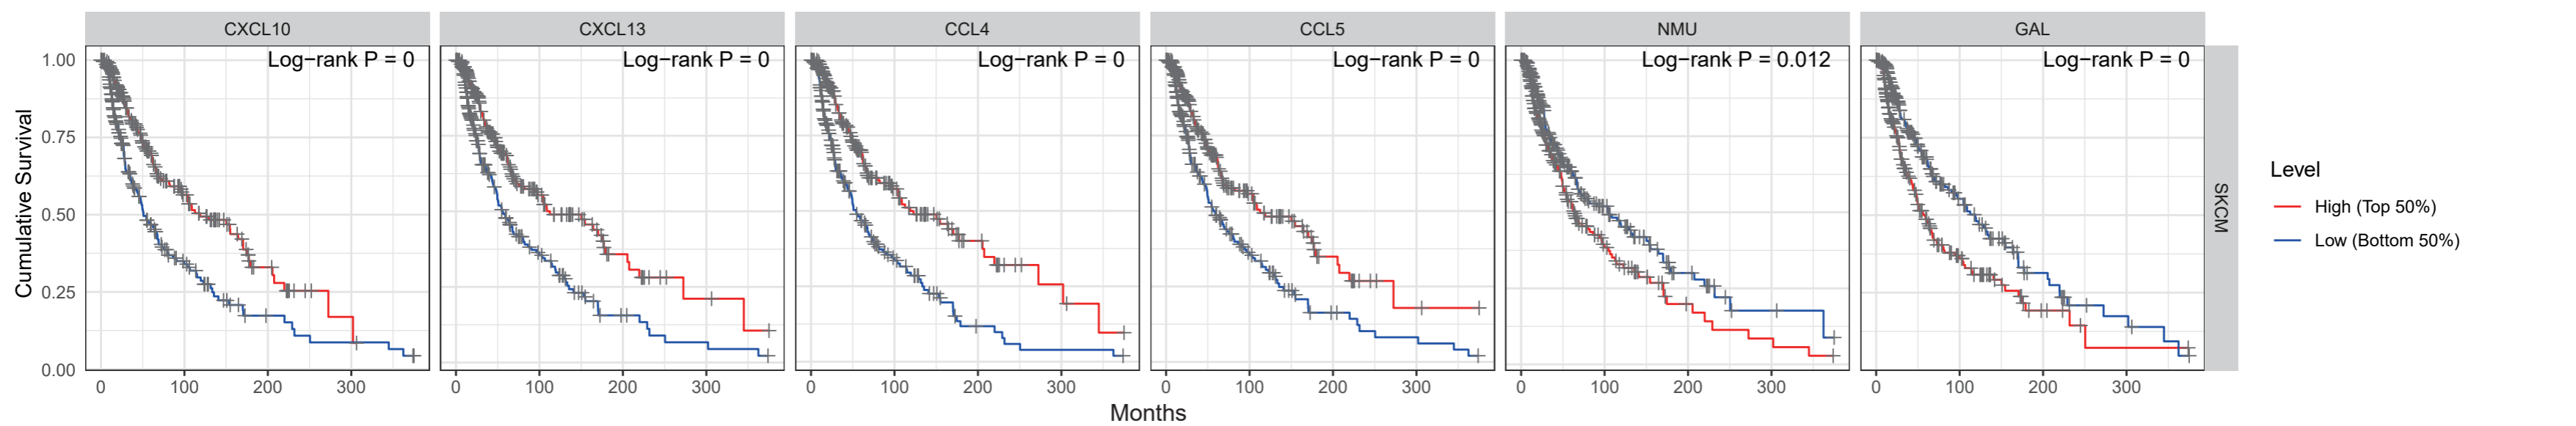

Supplement: MOESM3 [file 18011216]
